# Supplementary material
Source: PubMed Central journal article supplement (PMC3697352)
Supplement: AAC.02574-12_zac999101914so1.pdf [file AAC.02574-12_zac999101914so1.pdf]

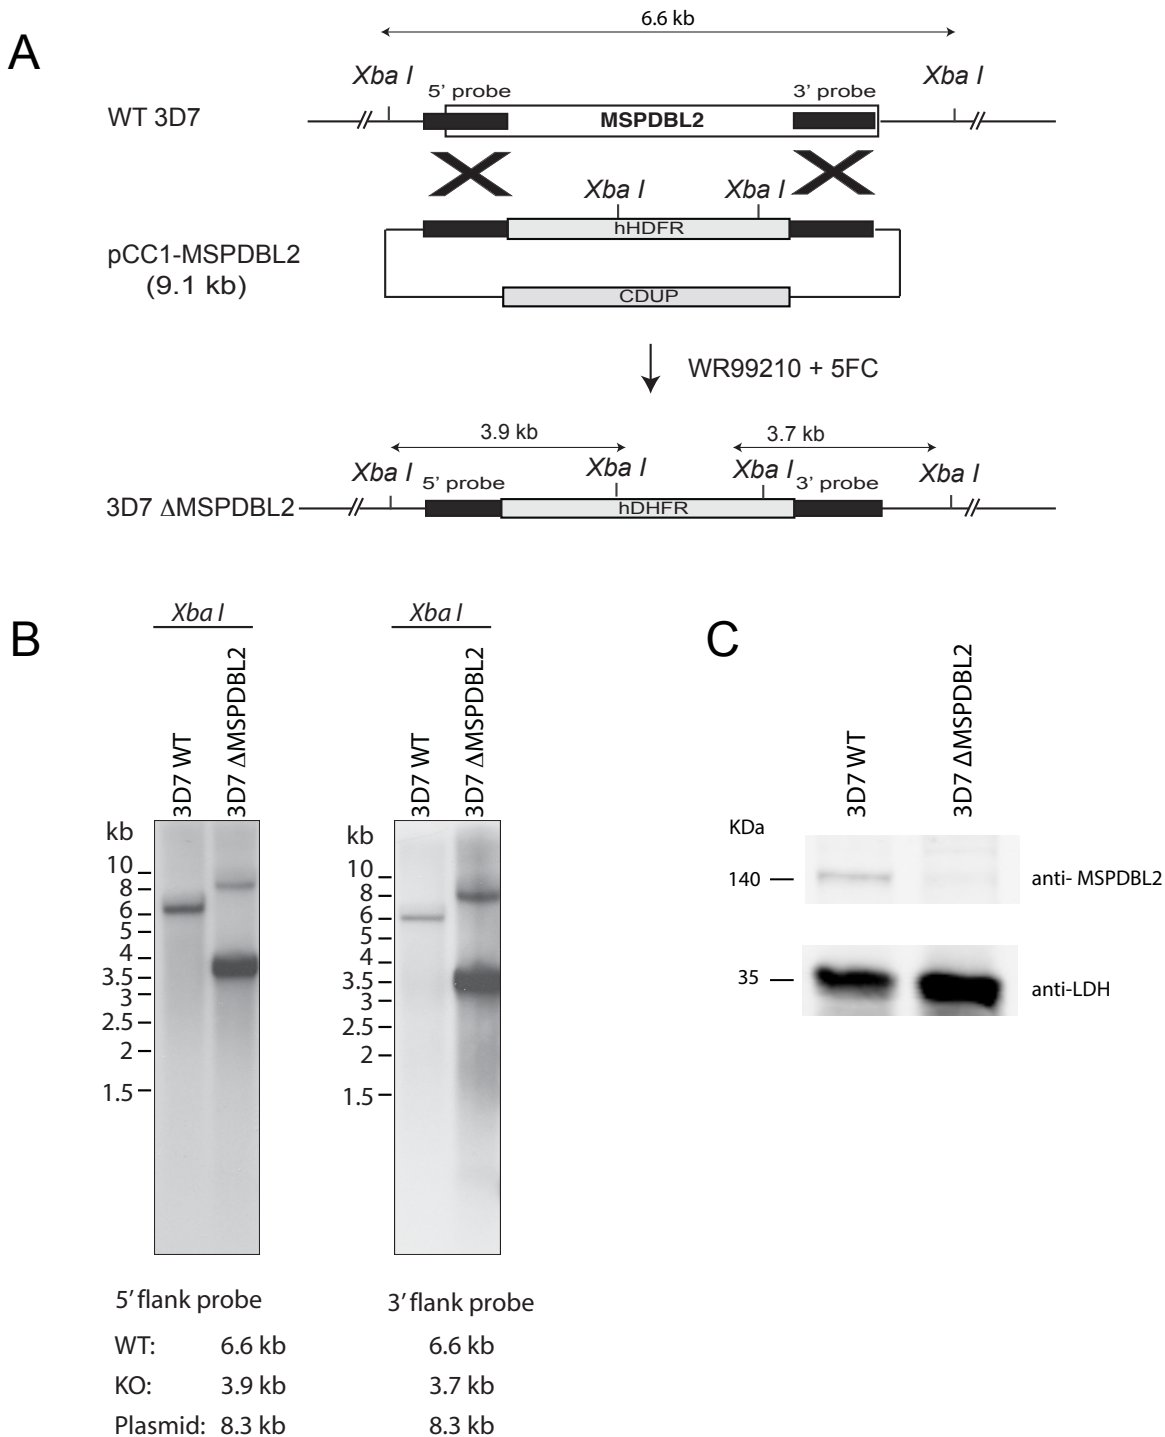

**FIG S1** Disruption of the *Pfmspdbl2* locus in 3D7 parasites. (A) Schematic showing targeted disruption of the *Pfmspdbl2* locus and resulting integrated locus. (B) Southern blot of 3D7 wild-type (3D7 WT) and *Pfmspdbl2* knockout (3D7  $\Delta$ MSPDBL2) lines. Digestion of the 3D7 WT locus with *Xba*I generates a single band of 6.6Kb, while digestion of the 3D7  $\Delta$ MSPDBL2 integrated locus generates a single band of 3.9Kb (5' flank probe) or 3.7Kb (3' flank probe). Plasmid is retained in the integrated line, as shown by the 8.3Kb bands in the 3D7  $\Delta$ MSPDBL2 lanes. (C) Western blot of schizonts from 3D7 WT and 3D7  $\Delta$ MSPDBL2 parasite lines, using polyclonal anti-MSPDBL2 antiserum and monoclonal anti-LDH antibodies.
